# Supplementary material for: Long-term mortality and outcome in hospital survivors of septic shock, sepsis, and severe infections: The importance of aftercare
Source: PubMed Central journal article supplement (PMC7015408; doi:10.1371/journal.pone.0228952), 2020-02-12
Supplement: pone.0228952.s001.pdf [file pone.0228952.s001.pdf]

**S1 Table: ICD-10-GM codes related to an infection for case selection**

| <b>ICD-10-GM code</b>                                        | <b>ICD-10-GM code description</b>                                                   |
|--------------------------------------------------------------|-------------------------------------------------------------------------------------|
| <b><u>I - Certain infectious and parasitic diseases</u></b>  |                                                                                     |
| A00-A09                                                      | Intestinal infectious diseases                                                      |
| A15-A19                                                      | Tuberculosis                                                                        |
| A20-A28                                                      | Certain zoonotic bacterial diseases                                                 |
| A30-A49                                                      | Other bacterial diseases                                                            |
| A50-A64                                                      | Infections with a predominantly sexual mode of transmission                         |
| A70-A74                                                      | Other diseases caused by chlamydia                                                  |
| A75-A79                                                      | Rickettsioses                                                                       |
| A92-A99                                                      | Arthropod-borne viral fevers and viral hemorrhagic fevers                           |
| B00                                                          | Herpes viral [herpes simplex] infections                                            |
| B01                                                          | Varicella [chickenpox]                                                              |
| B02                                                          | Zoster [herpes zoster]                                                              |
| B05                                                          | Measles                                                                             |
| B06                                                          | Rubella [German measles]                                                            |
| B15-B19                                                      | Viral hepatitis                                                                     |
| B25-B34                                                      | Other viral diseases                                                                |
| B37                                                          | Candidiasis                                                                         |
| B38                                                          | Coccidioidomycosis                                                                  |
| B39                                                          | Histoplasmosis                                                                      |
| B40                                                          | Blastomycosis                                                                       |
| B44                                                          | Aspergillosis                                                                       |
| B49                                                          | Unspecified mycosis                                                                 |
| B50-B64                                                      | Protozoal diseases                                                                  |
| B99                                                          | Other infectious diseases                                                           |
| <b><u>VI - Diseases of the nervous system</u></b>            |                                                                                     |
| G00                                                          | Bacterial meningitis, not elsewhere classified                                      |
| G01                                                          | Meningitis in bacterial diseases classified elsewhere                               |
| G02                                                          | Meningitis in other infectious and parasitic diseases classified elsewhere          |
| G04                                                          | Encephalitis, myelitis and encephalomyelitis                                        |
| G05                                                          | Encephalitis, myelitis and encephalomyelitis in diseases classified elsewhere       |
| G06                                                          | Intracranial and intraspinal abscess and granuloma                                  |
| G07                                                          | Intracranial and intraspinal abscess and granuloma in diseases classified elsewhere |
| G08                                                          | Intracranial and intraspinal phlebitis and thrombophlebitis                         |
| <b><u>VII - Diseases of the eye and adnexa</u></b>           |                                                                                     |
| H05.0                                                        | Acute inflammation of orbit                                                         |
| H44.0                                                        | Purulent endophthalmitis                                                            |
| <b><u>VIII - Diseases of the ear and mastoid process</u></b> |                                                                                     |
| H60.2                                                        | Malignant otitis externa                                                            |
| H70.0                                                        | Acute mastoiditis                                                                   |
| <b><u>IX - Diseases of the circulatory system</u></b>        |                                                                                     |
| I30.1                                                        | Infective pericarditis                                                              |
| I33.0                                                        | Acute and subacute infective endocarditis                                           |
| I40.0                                                        | Infective myocarditis                                                               |
| <b><u>X - Diseases of the respiratory system</u></b>         |                                                                                     |
| J01                                                          | Acute sinusitis                                                                     |
| J02                                                          | Acute pharyngitis                                                                   |
| J03                                                          | Acute tonsillitis                                                                   |
| J04                                                          | Acute laryngitis and tracheitis                                                     |
| J06                                                          | Acute upper respiratory infections of multiple and unspecified sites                |
| J09-J18                                                      | Influenza and pneumonia                                                             |
| J20-22                                                       | Other acute lower respiratory infections                                            |
| J36                                                          | Peritonsillar abscess                                                               |

| <b>ICD-10-GM code</b>                                                      | <b>ICD-10-GM code description</b>                                                    |
|----------------------------------------------------------------------------|--------------------------------------------------------------------------------------|
| J39.0                                                                      | Retropharyngeal and parapharyngeal abscess                                           |
| J39.1                                                                      | Other abscess of pharynx                                                             |
| J44.0                                                                      | Chronic obstructive pulmonary disease with acute lower respiratory infection         |
| J47.0                                                                      | Bronchiectasis                                                                       |
| J85-J86                                                                    | Suppurative and necrotic conditions of lower respiratory tract                       |
| J98.50                                                                     | Mediastinitis                                                                        |
| <b>XI - Diseases of the digestive system</b>                               |                                                                                      |
| K10.2                                                                      | Inflammatory conditions of jaws                                                      |
| K11.3                                                                      | Abscess of salivary gland                                                            |
| K12.2                                                                      | Cellulitis and abscess of mouth                                                      |
| K35                                                                        | Acute appendicitis                                                                   |
| K57.0                                                                      | Diverticular disease of small intestine with perforation and abscess                 |
| K57.2                                                                      | Diverticular disease of large intestine with perforation and abscess                 |
| K57.4                                                                      | Diverticular disease of both small and large intestine with perforation and abscess  |
| K57.8                                                                      | Diverticular disease of intestine, part unspecified, with perforation and abscess    |
| K61                                                                        | Abscess of anal and rectal regions                                                   |
| K63.0                                                                      | Abscess of intestine                                                                 |
| K63.1                                                                      | Perforation of intestine (nontraumatic)                                              |
| K65                                                                        | Peritonitis                                                                          |
| K75.0                                                                      | Abscess of liver                                                                     |
| K75.1                                                                      | Phlebitis of portal vein                                                             |
| K81.0                                                                      | Acute cholecystitis                                                                  |
| K83.0                                                                      | Cholangitis                                                                          |
| <b>XII - Diseases of the skin and subcutaneous tissue</b>                  |                                                                                      |
| L00                                                                        | Staphylococcal scalded skin syndrome                                                 |
| L01                                                                        | Impetigo                                                                             |
| L02                                                                        | Cutaneous abscess, furuncle and carbuncle                                            |
| L03                                                                        | Cellulitis                                                                           |
| L04                                                                        | Acute lymphadenitis                                                                  |
| L05                                                                        | Pilonidal cyst                                                                       |
| L08                                                                        | Other local infections of skin and subcutaneous tissue                               |
| L88                                                                        | Pyoderma gangrenosum                                                                 |
| <b>XIII - Diseases of the musculoskeletal system and connective tissue</b> |                                                                                      |
| M00                                                                        | Pyogenic arthritis                                                                   |
| M01                                                                        | Direct infections of joint in infectious and parasitic diseases classified elsewhere |
| M46.2                                                                      | Osteomyelitis of vertebra                                                            |
| M46.3                                                                      | Infection of intervertebral disc (pyogenic)                                          |
| M46.5                                                                      | Other infective spondylopathies                                                      |
| M60.0                                                                      | Infective myositis                                                                   |
| M72.6                                                                      | Necrotizing fasciitis                                                                |
| M86                                                                        | Osteomyelitis                                                                        |
| <b>XIV - Diseases of the genitourinary system</b>                          |                                                                                      |
| N10                                                                        | Acute tubulo-interstitial nephritis                                                  |
| N30.0                                                                      | Acute cystitis                                                                       |
| N30.8                                                                      | Other cystitis                                                                       |
| N30.9                                                                      | Cystitis, unspecified                                                                |
| N39.0                                                                      | Urinary tract infection, site not specified                                          |
| N41.0                                                                      | Acute prostatitis                                                                    |
| N41.2                                                                      | Abscess of prostate                                                                  |
| N41.3                                                                      | Prostatocystitis                                                                     |
| N41.8                                                                      | Other inflammatory diseases of prostate                                              |
| N45                                                                        | Orchitis and epididymitis                                                            |
| N70-77                                                                     | Inflammatory diseases of female pelvic organs                                        |

---

| ICD-10-GM code | ICD-10-GM code description |
|----------------|----------------------------|
|----------------|----------------------------|

---

**XV - Pregnancy, childbirth and the puerperium**

|       |                                                                                                   |
|-------|---------------------------------------------------------------------------------------------------|
| O03.0 | Spontaneous abortion : incomplete, complicated by genital tract and pelvic infection              |
| O03.5 | Spontaneous abortion : complete or unspecified, complicated by genital tract and pelvic infection |
| O04.0 | Medical abortion : incomplete, complicated by genital tract and pelvic infection                  |
| O05.0 | Other abortion : incomplete, complicated by genital tract and pelvic infection                    |
| O06.0 | Unspecified abortion : incomplete, complicated by genital tract and pelvic infection              |
| O07.0 | Failed medical abortion, complicated by genital tract and pelvic infection                        |
| O08.0 | Genital tract and pelvic infection following abortion and ectopic and molar pregnancy             |
| O23   | Infections of genitourinary tract in pregnancy                                                    |
| O41.1 | Infection of amniotic sac and membranes                                                           |
| O75.3 | Other infection during labour                                                                     |
| O85   | Puerperal sepsis                                                                                  |
| O86   | Other puerperal infections                                                                        |

**XVIII - Symptoms, signs and abnormal clinical and laboratory findings, not elsewhere classified**

|       |                                                                                    |
|-------|------------------------------------------------------------------------------------|
| R57.2 | Septic shock                                                                       |
| R65.0 | Systemic Inflammatory Response Syndrome of infectious origin without organ failure |
| R65.1 | Systemic Inflammatory Response Syndrome of infectious origin with organ failure    |

**XIX - Injury, poisoning and certain other consequences of external causes**

|               |                                                                                                    |
|---------------|----------------------------------------------------------------------------------------------------|
| T79.3         | Post-traumatic wound infection, not elsewhere classified                                           |
| T82.x - T85.x | Infection and inflammatory reaction due to other cardiac and vascular devices, implants and grafts |

---

International Classification of Diseases, 10th revision, German modification (ICD-10-GM) codes with diagnosis related to an infection used for appropriate case selection in context with the ICD abstraction strategy.
