# Supplementary material for: Long-term mortality and outcome in hospital survivors of septic shock, sepsis, and severe infections: The importance of aftercare
Source: PubMed Central journal article supplement (PMC7015408; doi:10.1371/journal.pone.0228952), 2020-02-12
Supplement: pone.0228952.s002.pdf [file pone.0228952.s002.pdf]

**S2 Table: ICD-10-GM and OPS codes related to acute organ dysfunction and shock**

| Organ system   | ICD-10-GM or OPS code | ICD-10-GM or OPS code description                                                        |
|----------------|-----------------------|------------------------------------------------------------------------------------------|
| Cardiovascular | ICD - I50             | Heart failure                                                                            |
|                | ICD - I95.8           | Other hypotension                                                                        |
|                | ICD - I95.9           | Hypotension, unspecified                                                                 |
|                | ICD - I98.1           | Cardiovascular disorders in other infectious and parasitic diseases classified elsewhere |
|                | ICD - I98.8           | Other specified disorders of circulatory                                                 |
|                | ICD - I99             | Other and unspecified disorders of circulatory system                                    |
| Hematologic    | ICD - D65             | Disseminated intravascular coagulation (defibrination syndrome)                          |
|                | ICD - D69.5           | Secondary thrombocytopenia                                                               |
|                | ICD - D69.6           | Thrombocytopenia, unspecified                                                            |
| Hepatic        | ICD - K72.0           | Acute and subacute hepatic failure                                                       |
|                | ICD - K72.9           | Hepatic failure, unspecified                                                             |
|                | ICD - K76.8           | Other specified diseases of liver                                                        |
|                | OPS - 8-858           | Extracorporeal liver replacement therapy (liver dialysis)                                |
| Neurologic     | ICD - F05.0           | Delirium not superimposed on dementia, so described                                      |
|                | ICD - F05.8           | Other delirium                                                                           |
|                | ICD - F05.9           | Delirium, unspecified                                                                    |
|                | ICD - R40.0           | Somnolence                                                                               |
|                | ICD - R40.1           | Stupor                                                                                   |
|                | ICD - R40.2           | Coma, unspecified                                                                        |
| Renal          | ICD - N17             | Acute renal failure                                                                      |
|                | OPS - 8-853           | Hemofiltration                                                                           |
|                | OPS - 8-853           | Hemodialysis                                                                             |
|                | OPS - 8-854           | Hemodiafiltration                                                                        |
| Respiratory    | ICD - J80             | Adult respiratory distress syndrome                                                      |
|                | ICD - J96.0           | Acute respiratory failure                                                                |
|                | ICD - U04.9           | Severe acute respiratory syndrome (SARS)                                                 |
|                | OPS - 8-852           | Extracorporeal membrane oxygenation (ECMO) therapy                                       |
|                | OPS - 8-713           | Mechanical Ventilation in adults                                                         |
|                | OPS - 8-714           | Specialized mechanical ventilation in severe respiratory failure                         |
| Other          | ICD - R65.1           | Severe Sepsis                                                                            |
| Shock          | ICD - R57.2           | Septic shock                                                                             |
|                | ICD - R57.8           | Other shock                                                                              |
|                | ICD - R57.9           | Shock, unspecified                                                                       |

International Classification of Diseases, 10th revision, German modification (ICD-10-GM) and Operation and Procedure (OPS) codes for appropriate group allocation in septic shock, sepsis and severe infections in context with the ICD abstraction strategy.
